# Supplementary material for: Mixed (phthalocyaninato)(porphyrinato) heterometal complexes with sandwich quadruple-decker molecular structure
Source: Royal Society of Chemistry journal article supplement (doi:10.1039/c1cc11190f), 2011-01-01
Supplement: c1cc11190f.pdf [file c1cc11190f.pdf]

## Supporting Information

### **Mixed (Phthalocyaninato)(porphyrinato) Heterometal Complexes with Sandwich Quadruple-decker Molecular Structure**

Hailong Wang,<sup>a</sup> Kang Wang,<sup>a</sup> Yongzhong Bian,<sup>a</sup> Jianzhuang Jiang<sup>\*a</sup> and Nagao  
Kobayashi<sup>\*b</sup>

## Experimental Section

**The synthesis of [(TCIPP)M(III)(Pc)Cd(II)(Pc)M(III)(Pc)] (M = Eu, Y) (1, 2):** A mixture of Cd(OAc)<sub>2</sub>·2H<sub>2</sub>O (5.3 mg, 0.02 mmol), neutral mixed ring rare earth double-decker [(TCIPP)M(Pc)] (0.01 mmol), and neutral bis(phthalocyaninato) rare earth compound [(Pc)M(III)(Pc)] (M = Eu, Y) (0.01 mmol) in TCB (4 mL) was heated to reflux under nitrogen for 5 h. After being cooled to room temperature, the volatiles were removed under reduced pressure. The residue was chromatographed on a silica gel column using CHCl<sub>3</sub> as the eluent to give a purple band, which contained mainly the unreacted mixed ring rare earth double-decker [(TCIPP)M(Pc)] and a small amount of the quadruple-decker [(Por)M(III)(Pc)Cd(II)(Pc)M(III)(Por)]. Further elution with CHCl<sub>3</sub> gave a blue band containing the unreacted homoleptic bis(phthalocyaninato) rare earth double-decker [M(Pc)<sub>2</sub>], which was followed by two blue bands containing the target quadruple-decker complexes [(Por)M(III)(Pc)Cd(II)(Pc)M(III)(Pc)] and [(Pc)M(III)(Pc)Cd(II)(Pc)M(III)(Pc)], respectively. The symmetrical mixed ring quadruple-decker compound [(Por)M(III)(Pc)Cd(II)(Pc)M(III)(Por)] could not be isolated due to its poor stability which decomposed into mixed ring rare earth double-decker [(TCIPP)M(Pc)]. Repeated chromatography followed by recrystallization from chloroform and methanol gave the pure sandwich-type mixed (phthalocyaninato)(porphyrinato) 4d-4f heterometal quadruple-decker complexes [(Por)M(III)(Pc)Cd(II)(Pc)M(III)(Pc)] (M = Eu, Y) (1, 2) in the yield of 9-14% together with small amount of

$[(Pc)M(III)(Pc)Cd(II)(Pc)M(III)(Pc)]$  (M = Eu, Y), 3-5%.

Single crystals of quadruple-decker compound **1** suitable for X-ray diffraction analysis have been obtained by diffusion of the methanol into a solution of this complex in chloroform. The crystallographical data of **1** has been determined by X-ray diffraction analysis at 100 K using Oxford Diffraction Gemini E system. MS (MALDI-TOF) for **1**: an isotopic cluster peaking at  $m/z$  2704.71 (Calcd. for  $M^+$  2704.41). Anal. Calcd. for  $C_{140}H_{74}CdCl_4Eu_2N_{28} \cdot 2H_2O \cdot CH_3OH$ : C 61.08, H 2.91, N 14.15; Found: C 60.87, H 3.02, N 13.73. MS (MALDI-TOF) for **2**: an isotopic cluster peaking at  $m/z$  2578.73 (Calcd. for  $M^+$  2578.29). Anal. Calcd. for  $C_{140}H_{74}CdCl_4Y_2N_{28} \cdot H_2O \cdot CHCl_3$ : C 62.36, H 2.78, N 14.44; Found: C 62.36, H 3.10, N 14.72.

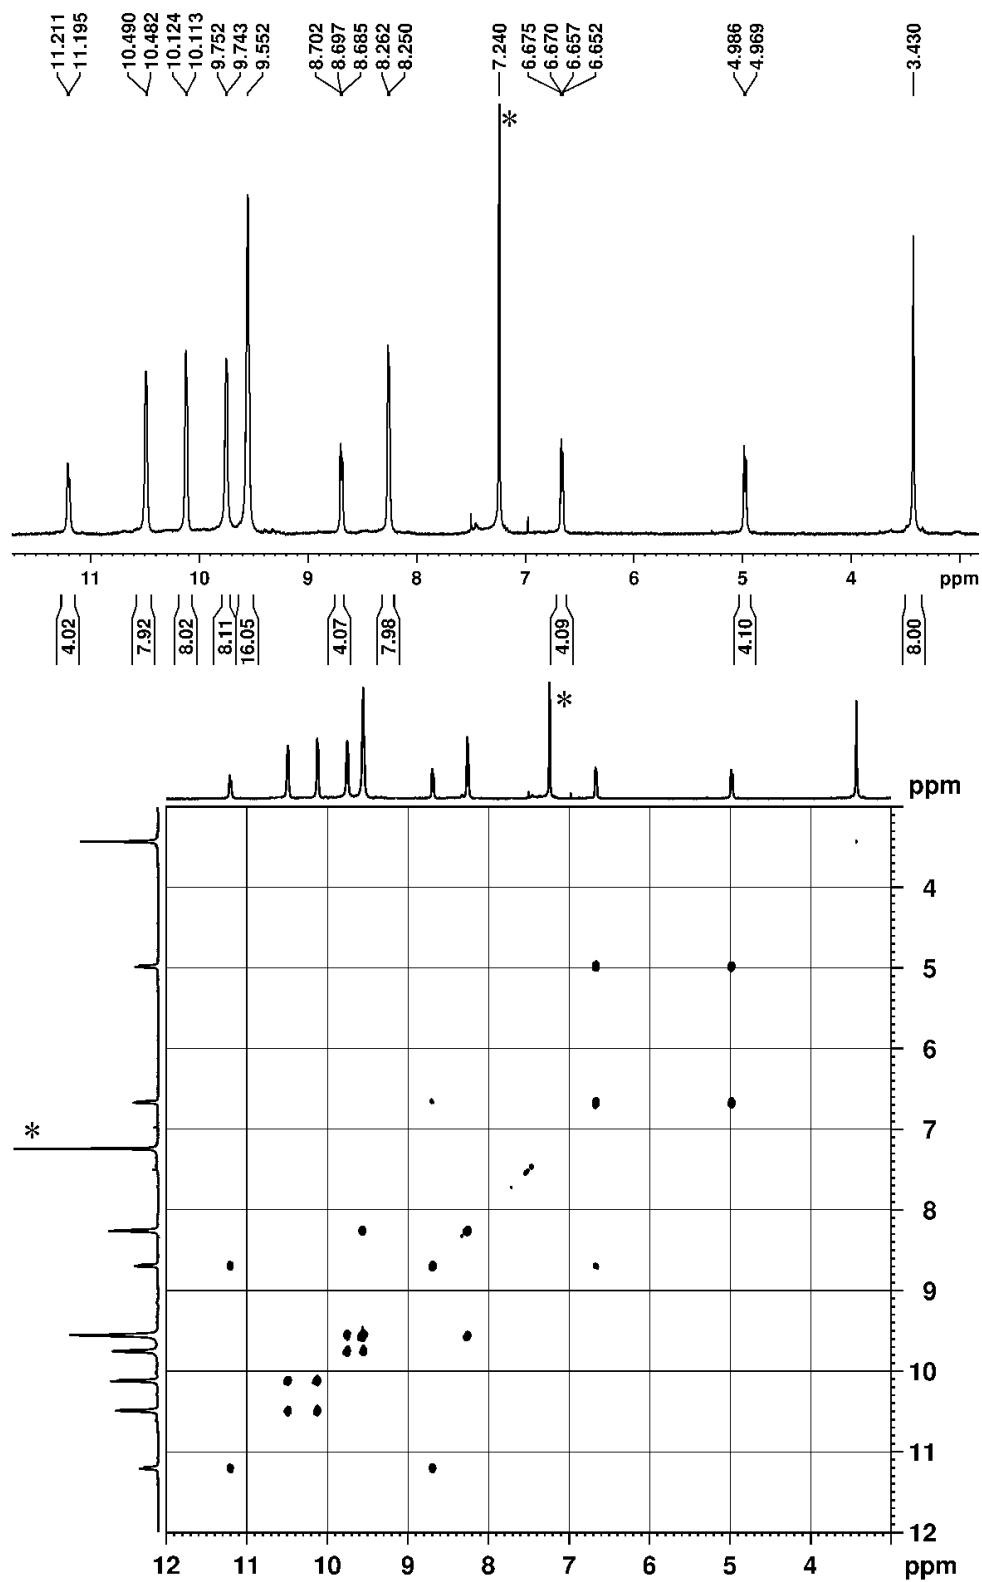

**Figure S1.**  $^1H$  NMR and  $^1H$ - $^1H$  COSY spectra of  $[(TCIPP)Eu(III)(Pc)Cd(II)(Pc)Eu(III)(Pc)]$  (**1**) in  $CDCl_3$ .

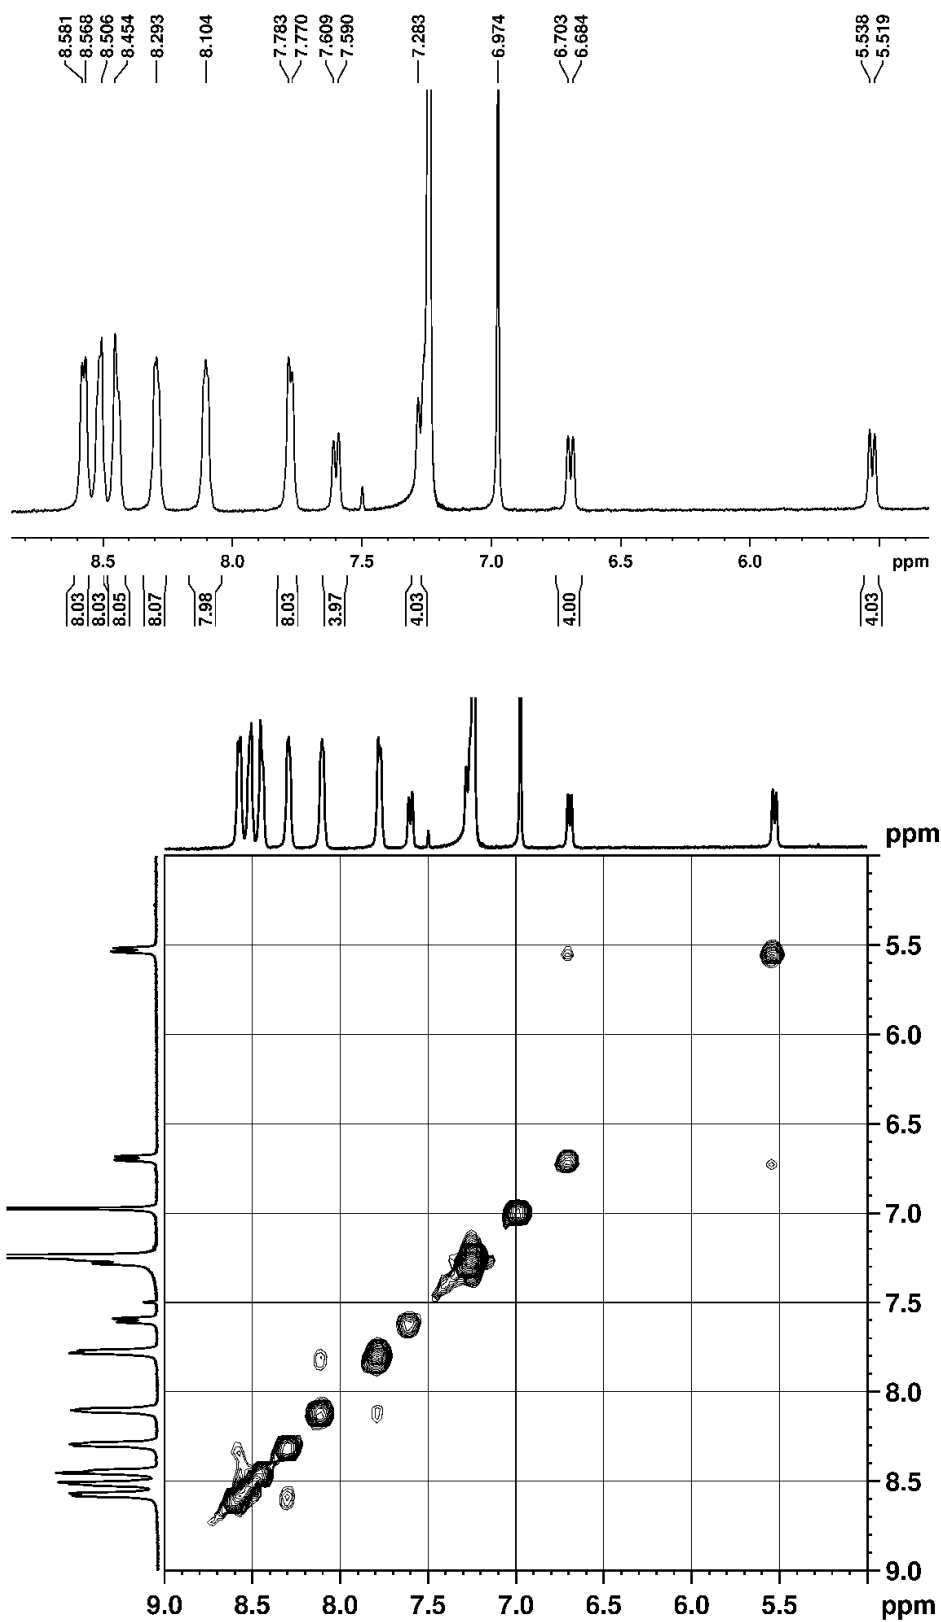

**Figure S2.** <sup>1</sup>H NMR and <sup>1</sup>H-<sup>1</sup>H COSY spectra of [(TCIPP)Y(III)(Pc)Cd(II)(Pc)Y(III)(Pc)] (**2**) in CDCl<sub>3</sub>.

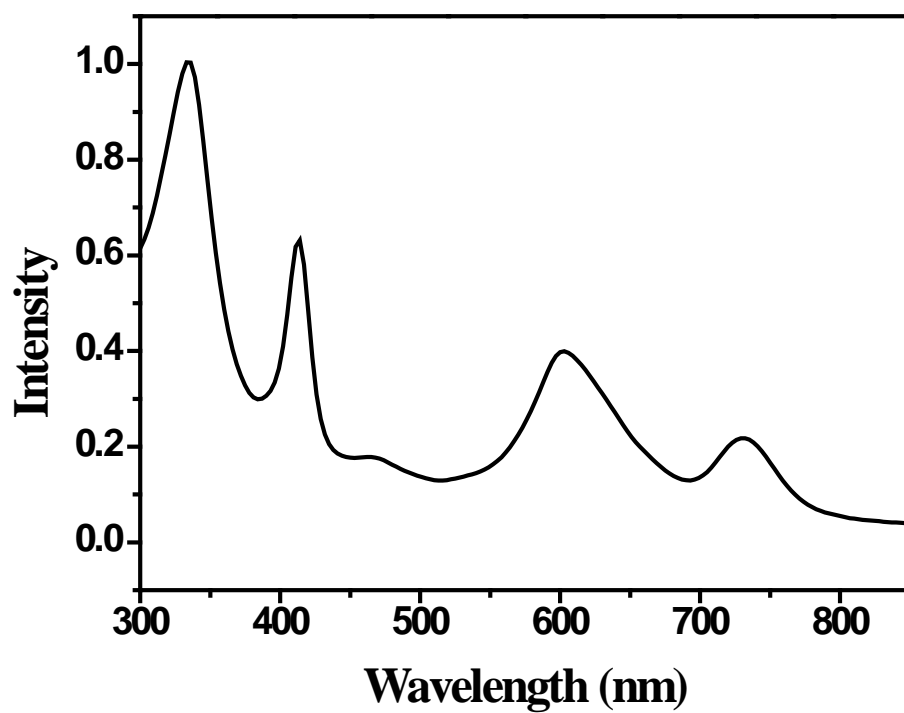

**Figure S3.** Electronic absorption spectrum of [(TCIPP)Y(III)(Pc)Cd(II)(Pc)Y(III)(Pc)] (**2**) in CHCl<sub>3</sub>.

**Table S1.**  $^1\text{H}$  NMR data ( $\delta$ ) and assignments of the sandwich-type mixed (phthalocyaninato)(porphyrinato) quadruple-decker complexes with rare earth and cadmium  $[(\text{TCIPP}^{2-})\text{M}(\text{III})(\text{Pc}^{2-})\text{Cd}(\text{II})(\text{Pc}^{2-})\text{M}(\text{III})(\text{Pc}^{2-})]$  ( $\text{M} = \text{Eu}, \text{Y}$ ) (**1**, **2**) in  $\text{CDCl}_3$ .

| Compound | Pc1               |                  | Pc2               |                       | Pc3               |                  |
|----------|-------------------|------------------|-------------------|-----------------------|-------------------|------------------|
|          | $\text{H}^\alpha$ | $\text{H}^\beta$ | $\text{H}^\alpha$ | $\text{H}^\beta$      | $\text{H}^\alpha$ | $\text{H}^\beta$ |
| <b>1</b> | 10.49 (d)         | 10.12 (d)        | 9.75 (d)          | 9.55 (m) <sup>a</sup> | 9.55 (m)          | 8.26 (d)         |
| <b>2</b> | 8.58 (d)          | 8.51 (d)         | 8.45 (d)          | 8.29 (d)              | 8.10 (d)          | 7.78 (d)         |

  

| Compound | TCIPP                          |                               |                               |                              |                                   |
|----------|--------------------------------|-------------------------------|-------------------------------|------------------------------|-----------------------------------|
|          | $\text{H}^{\text{endo-ortho}}$ | $\text{H}^{\text{endo-meta}}$ | $\text{H}^{\text{exo-ortho}}$ | $\text{H}^{\text{exo-meta}}$ | $\text{H}^{\beta\text{-pyrrole}}$ |
| <b>1</b> | 11.21 (d)                      | 8.70 (m)                      | 6.68 (m)                      | 4.99 (d)                     | 3.43 (s)                          |
| <b>2</b> | 7.61 (d)                       | 7.28 (d) <sup>b</sup>         | 6.70 (d)                      | 5.54 (d)                     | 6.97 (s)                          |

[a] Overlapped signal between the  $\text{H}^\beta$  of the Pc2 ring and  $\text{H}^\alpha$  of the Pc3 ring.

[b] Obscured by the strong residual  $\text{CHCl}_3$  signal at  $\delta 7.24$ .

**Table S2.** Comparison in the electronic absorption bands for the mixed (phthalocyaninato)(porphyrinato) rare earth and cadmium quadruple-decker complexes **1** and **2** with their double-decker precursors in CHCl<sub>3</sub>.

| Compound                                      | abs, $\lambda_{\max}$ /nm |     |     |     |
|-----------------------------------------------|---------------------------|-----|-----|-----|
| <b>1</b>                                      | 337                       | 416 | 613 | 718 |
| [(TCIPP <sup>2-</sup> )Eu(Pc <sup>•-</sup> )] | 330                       | 409 | 473 | 728 |
| [(Pc <sup>2-</sup> )Eu(Pc <sup>•-</sup> )]    | 322                       | 459 | 605 | 671 |
| <b>2</b>                                      | 334                       | 412 | 603 | 731 |
| [(TCIPP <sup>2-</sup> )Y(Pc <sup>•-</sup> )]  | 332                       | 401 | 470 | 732 |
| [(Pc <sup>2-</sup> )Y(Pc <sup>•-</sup> )]     | 319                       | 458 | 598 | 663 |



**Table S3.** Comparison in the half-wave redox potentials of the mixed (phthalocyaninato)(porphyrinato) rare earth and cadmium quadruple-decker complexes **1** and **2** with their double-decker precursors (V vs SCE) in CH<sub>2</sub>Cl<sub>2</sub> containing 0.1 M TBAP.

| Compound                                      | Oxd <sub>4</sub> | Oxd <sub>3</sub>   | Oxd <sub>2</sub> | Oxd <sub>1</sub> | Red <sub>1</sub> | Red <sub>2</sub> | Red <sub>3</sub>   | $\Delta E^{\circ}_{1/2}$ |
|-----------------------------------------------|------------------|--------------------|------------------|------------------|------------------|------------------|--------------------|--------------------------|
| <b>1</b>                                      | +1.36            | +1.18              | +0.70            | +0.36            | -0.66            | -1.02            | -1.33              | 1.02                     |
| [(TCIPP <sup>2-</sup> )Eu(Pc <sup>•-</sup> )] |                  | +1.69 <sup>a</sup> | +1.39            | +0.72            | +0.21            | -1.28            | -1.66 <sup>a</sup> | 0.51                     |
| [(Pc <sup>2-</sup> )Eu(Pc <sup>•-</sup> )]    |                  |                    | +1.59            | +0.55            | +0.12            | -1.07            | -1.29              | 0.43                     |
| <b>2</b>                                      | +1.39            | +1.13              | +0.68            | +0.31            | -0.64            | -0.98            | -1.34              | 0.95                     |
| [(TCIPP <sup>2-</sup> )Y(Pc <sup>•-</sup> )]  |                  | +1.74              | +1.41            | +0.69            | +0.18            | -1.28            | -1.69 <sup>a</sup> | 0.51                     |
| [(Pc <sup>2-</sup> )Y(Pc <sup>•-</sup> )]     |                  |                    | +1.61            | +0.47            | +0.06            | -1.11            | -1.35              | 0.41                     |

<sup>a</sup> By differential pulse voltammetry with a scan rate of 10 mV s<sup>-1</sup>.
